# Supplementary material
Source: publisher site journal article supplement (https://www.dovepress.com/article/571291)
Supplement: Supplementary file 1 [file 571291%20Revised%20Supplementary%20Materials.docx]

**Supplementary Table S1** Age-stratified associations between thyroid hormone sensitivity indices and PAD in euthyroid patients with T2DM

|  | Exposure / Age group | ≤ 60 (OR, 95% CI, P) | ˃ 60 (OR, 95% CI, P) | P for interaction |
| --- | --- | --- | --- | --- |
| TFQI |  |  |  |  |
|  | univariable | 1.985 (0.873–4.632), 0.106 | 1.97 (1.006–3.928), 0.05 |  |
|  | multivariable | 2.095 (0.894–5.05), 0.092 | 1.885 (0.947–3.816), 0.074 | 0.867 |
| TSHI |  |  |  |  |
|  | univariable | 1.668 (0.912–3.121), 0.102 | 1.595 (0.992–2.607), 0.057 |  |
|  | multivariable | 1.777 (0.945–3.426), 0.079 | 1.508 (0.927–2.492), 0.102 | 0.796 |
| TT4RI |  |  |  |  |
|  | univariable | 1.026 (1.001–1.052), 0.043 | 1.015 (0.995–1.036), 0.135 |  |
|  | multivariable | 1.031 (1.003–1.059), 0.028 | 1.013 (0.993–1.034), 0.202 | 0.448 |
| FT3/FT4 |  |  |  |  |
|  | univariable | 0.001 (0–0.667), 0.041 | 0.005 (0–0.785), 0.043 |  |
|  | multivariable | 0.001 (0–0.913), 0.051 | 0.006 (0–1.004), 0.054 | 0.702 |

**Notes:** OR and 95% CI were derived from multivariable logistic regression models within each age stratum. Models were adjusted for sex, hypertension, smoking, alcohol drinking, duration, HbA1c, LDL‑C, and eGFR (age was not included as a covariate in the age‑stratified models). P for interaction was obtained by adding a cross‑product term between the continuous thyroid hormone sensitivity index and the categorical age group into the overall model.

**Abbreviations:** TFQI, thyroid feedback quantile-based index; TSHI, thyroid

stimulating hormone index; TT4RI, thyrotropin thyroxine resistance index; FT3/FT4, free triiodothyronine/free thyroxine

**Supplementary Table S2**. Sensitivity analyses replacing LDL‑C with other lipid parameters in multivariable models of PAD

| Model | Index | OR | 95% CI |
| --- | --- | --- | --- |
| LDL-C | TFQI | 0.802 | 0.218–2.951 |
|  | TSHI  TT4RI | 1.208  1.017 | 0.259–5.630  0.968–1.068 |
|  | FT3/FT4 | 0.004 | 0.000–0.487 |
| HDL-C | TFQI | 0.825 | 0.224–3.041 |
|  | TSHI  TT4RI | 1.172  1.017 | 0.249–5.509  0.968–1.069 |
|  | FT3/FT4 | 0.004 | 0.000–0.478 |
| TG | TFQI | 0.809 | 0.220–2.968 |
|  | TSHI  TT4RI | 1.202  1.016 | 0.258–5.610  0.968–1.068 |
|  | FT3/FT4 | 0.004 | 0.000–0.476 |
| TC | TFQI | 0.838 | 0.227–3.094 |
|  | TSHI  TT4RI | 1.174  1.017 | 0.251–5.492  0.968–1.068 |
|  | FT3/FT4 | 0.004 | 0.000–0.450 |

**Notes:** All models are multivariable logistic regression models with PAD as the dependent variable and include the four thyroid hormone sensitivity indices (TFQI, TSHI, FT3/FT4, TT4RI) simultaneously.

Covariates are sex, age, hypertension, smoking, alcohol drinking, duration, HbA1c, and eGFR.

In the main model, LDL-C was included as the lipid parameter. In the sensitivity models, LDL-C was replaced by HDL-C, TG, or TC, respectively, while all other covariates were kept unchanged.

**Abbreviations:** TFQI, thyroid feedback quantile-based index; TSHI, thyroid

stimulating hormone index; TT4RI, thyrotropin thyroxine resistance index; FT3/FT4, free triiodothyronine/free thyroxine; LDL-C, low-density lipoprotein cholesterol; HDL-C, high-density lipoprotein Cholesterol; TG, triglycerides; TC, total cholesterol.
